# Supplementary material
Source: MDPI journal article supplement (https://www.mdpi.com/2073-4395/13/5/1378)
Supplement: s1 [file s1]

1 **Supplementary material**

2 **Table S1.** Details of the LC-MS/MS parameters for the analyzed pesticides in the wheat plants.

| Active substance | Matrix effect (%) | Mean recovery (%) | LOD <sup>1</sup> (µg g <sup>-1</sup> FW) | LOQ <sup>2</sup> (µg g <sup>-1</sup> FW) | Quantification            |                     | Confirmation              |                     | DP <sup>4</sup> (V) | EP <sup>5</sup> (V) |
|------------------|-------------------|-------------------|------------------------------------------|------------------------------------------|---------------------------|---------------------|---------------------------|---------------------|---------------------|---------------------|
|                  |                   |                   |                                          |                                          | MRM transition <i>m/z</i> | CE <sup>3</sup> (V) | MRM transition <i>m/z</i> | CE <sup>3</sup> (V) |                     |                     |
| Sulfosulfuron    | -8                | 96                | 0.002                                    | 0.005                                    | 471>211                   | 10                  | 471>261                   | 10                  | 76                  | 10                  |
| Propiconazole    | 12                | 87                | 0.001                                    | 0.005                                    | 342>159                   | 37                  | 342>69                    | 23                  | 100                 | 10                  |
| Cyproconazole    | 8                 | 79                | 0.001                                    | 0.005                                    | 292>70                    | 23                  | 292>125                   | 45                  | 61                  | 10                  |
| Spiroxamine      | -10               | 92                | 0.002                                    | 0.005                                    | 298.1>144.1               | 27                  | 298.1>100                 | 43                  | 71                  | 10                  |
| Tebuconazole     | 13                | 83                | 0.001                                    | 0.005                                    | 308.1>70                  | 57                  | 308.1>125.1               | 59                  | 41                  | 10                  |
| Triadimenol      | -12               | 87                | 0.002                                    | 0.005                                    | 296>70                    | 19                  | 296>70                    | 15                  | 56                  | 10                  |

3 <sup>1</sup> LOD: Limit of detection; <sup>2</sup> LOQ: Limit of quantification; <sup>3</sup> CE: Collision energy; <sup>4</sup> DP: Declustering potential; <sup>5</sup> EP: Collision chamber inlet voltage.

4
