# Supplementary material
Source: MDPI journal article supplement (https://www.mdpi.com/2073-4395/13/5/1378)
Supplement: s1 [file s1]

### **Supplementary material**

**Table S3.** Morphological parameters of the wheat and Fusarium head blight severity.

| Treatment <sup>1</sup> | Plant height (cm) | Ear length (cm) | Fusarium head blight severity (%) |
|------------------------|-------------------|-----------------|-----------------------------------|
| T0                     | 65 <sup>a</sup>   | 6 <sup>ab</sup> | 10 <sup>a</sup>                   |
| T1                     | 63 <sup>c</sup>   | 4 <sup>a</sup>  | 43 <sup>b</sup>                   |
| T2                     | 67 <sup>ab</sup>  | 7 <sup>bc</sup> | 7 <sup>a</sup>                    |
| T3                     | 63 <sup>c</sup>   | 6 <sup>ab</sup> | 28 <sup>c</sup>                   |
| T4                     | 68 <sup>b</sup>   | 8 <sup>c</sup>  | 7 <sup>a</sup>                    |
| T5                     | 65 <sup>a</sup>   | 8 <sup>c</sup>  | 25 <sup>c</sup>                   |
| T6                     | 68 <sup>b</sup>   | 9 <sup>c</sup>  | 5 <sup>a</sup>                    |
| T7                     | 66 <sup>a</sup>   | 8 <sup>c</sup>  | 24 <sup>c</sup>                   |

<sup>1</sup> T0 – control; T1 – *F. culmorum*; T2 – herbicide + fungicide 1 + fungicide 2; T3 – herbicide + fungicide 1 + fungicide 2 + *F. culmorum*; T4 – herbicide + fungicide 1 + fungicide 2 + humic acids; T5 - herbicide + fungicide 1 + fungicide 2 + humic acids + *F. culmorum*; T6 – herbicide + fungicide 1 + fungicide 2 + nitrophenols; and T7 – herbicide + fungicide 1 + fungicide 2 + nitrophenols + *F. culmorum*. The values of each parameter are averaged. The same letter indicates no statistically significant difference between treatments ( $P \geq 0.05$ ), determined with ANOVA followed by Fisher's test.
