# Supplementary material
Source: MDPI journal article supplement (https://www.mdpi.com/2073-4395/13/5/1378)
Supplement: s1 [file s1]

1 **Supplementary material**

2 **Table S2.** Detailed concentration of all the amino acids examined in the wheat grain ( $\mu\text{g kg}^{-1}$  DW).

| Treatment <sup>1</sup> | Asp <sup>2</sup> | Glu   | Gln  | Ala  | Ser  | Asn  | Gly  | Tyr | Pro | Cis | Trp   | Arg   | Lys  | Phe  | Thr  | Val  | His  | Iso | Leu | Met | Sum    |
|------------------------|------------------|-------|------|------|------|------|------|-----|-----|-----|-------|-------|------|------|------|------|------|-----|-----|-----|--------|
| T0                     | 208.4            | 78.4  | 29.8 | 25.3 | 14.8 | 3.1  | 10.7 | 4.4 | 1.9 | 1.7 | 111.4 | 75.6  | 18.9 | 8.7  | 14.4 | 12.3 | 7.1  | 3.7 | 3.1 | 1.6 | 635.2a |
| T1                     | 241.0            | 84.1  | 63.6 | 33.7 | 15.6 | 28.2 | 15.1 | 7.1 | 2.0 | 2.1 | 117.4 | 101.5 | 44.1 | 16.8 | 14.2 | 13.3 | 10.5 | 5.7 | 4.9 | 2.4 | 823.2b |
| T2                     | 237.6            | 94.3  | 30.2 | 20.5 | 14.5 | 10.5 | 10.1 | 7.1 | 1.2 | 0.7 | 111.9 | 100.3 | 22.1 | 13.7 | 13.3 | 10.7 | 8.9  | 3.4 | 2.5 | 1.2 | 714.7c |
| T3                     | 224.7            | 73.8  | 23.8 | 19.5 | 12.6 | 2.9  | 7.3  | 5.9 | 1.2 | 0.7 | 85.5  | 109.0 | 15.9 | 11.6 | 12.3 | 9.7  | 7.1  | 2.9 | 2.2 | 1.1 | 629.7a |
| T4                     | 207.2            | 73.2  | 43.6 | 13.1 | 13.6 | 12.5 | 10.3 | 6.7 | 1.3 | 1.7 | 113.6 | 97.6  | 39.0 | 12.4 | 11.3 | 8.6  | 15.3 | 3.2 | 2.2 | 1.1 | 687.4c |
| T5                     | 223.8            | 67.6  | 48.1 | 17.1 | 11.4 | 14.9 | 6.7  | 5.2 | 1.2 | 1.2 | 76.1  | 77.6  | 27.2 | 9.5  | 9.8  | 6.5  | 11.2 | 2.4 | 1.6 | 0.8 | 619.9a |
| T6                     | 274.4            | 111.6 | 45.8 | 21.5 | 14.4 | 3.2  | 8.5  | 7.1 | 1.2 | 0.8 | 139.7 | 109.1 | 27.8 | 13.7 | 14.4 | 10.8 | 7.9  | 3.2 | 2.4 | 1.2 | 819.0b |
| T7                     | 221.0            | 79.1  | 19.8 | 18.7 | 12.4 | 2.9  | 7.2  | 6.1 | 1.2 | 0.6 | 131.8 | 96.2  | 15.4 | 11.7 | 12.2 | 9.8  | 7.3  | 3.0 | 2.3 | 1.1 | 659.9d |

3 <sup>1</sup> T0, control; T1, *F. culmorum*; T2, herbicide + fungicide 1 + fungicide 2; T3, herbicide + fungicide 1 + fungicide 2 + *F. culmorum*; T4, herbicide + fungicide 1 + fungicide 2  
4 + humic acids; T5, herbicide + fungicide 1 + fungicide 2 + humic acids + *F. culmorum*; T6, herbicide + fungicide 1 + fungicide 2 + nitrophenols; T7, herbicide + fungicide 1  
5 + fungicide 2 + nitrophenols + *F. culmorum*.

6 <sup>2</sup> Asp, Aspartic acid; Glu, Glutamic acid; Gln, Glutamine; Ala, Alanine; Ser, Serine; Asn, Asparagine; Gly, Glycine; Tyr, Tyrosine; Pro, Proline; Cis, Cystine; Trp,  
7 Tryptophan; Arg, Arginine; Lys, Lysine; Phe, Phenylalanine; Thr, Threonine; Val, Valine; His, Histidine; Iso, Isoleucine; Leu, Leucine; Met, Methionine.

8
